# Supplementary material for: Anti-perovskite carbides Ca6CSe4and Sr6CSe4for photovoltaics with similar optoelectronic properties to MAPbI3
Source: Royal Society of Chemistry journal article supplement (doi:10.1039/d2ta05789a), 2022-01-01
Supplement: d2ta05789a1.pdf [file d2ta05789a1.pdf]

## Supporting Information

### Anti-Perovskite Carbides $\text{Ca}_6\text{CSe}_4$ and $\text{Sr}_6\text{CSe}_4$ for Photovoltaics with Similar Optoelectronic Properties to $\text{MAPbI}_3$

Wen-hui Guo,<sup>a</sup> Hong-xia Zhong,<sup>\*b</sup> Juan Du,<sup>a</sup> Yao-hui Zhu,<sup>c</sup> Shi-ming Liu,<sup>a</sup>

Yong He,<sup>a</sup> Chong Tian,<sup>a</sup> Min Zhang,<sup>d</sup> Xinqiang Wang<sup>a</sup> and Jun-jie Shi<sup>\*a</sup>

<sup>a</sup>*State Key Laboratory for Artificial Microstructures and Mesoscopic Physics, School of Physics, Peking University Yangtze Delta Institute of Optoelectronics, Peking University, Beijing 100871, China.*

<sup>b</sup>*School of Mathematics and Physics, China University of Geosciences, Wuhan 430074, China*

<sup>c</sup>*Physics Department, Beijing Technology and Business University, Beijing 100048, China*

<sup>d</sup>*Inner Mongolia Key Laboratory for Physics and Chemistry of Functional Materials, College of Physics and Electronic Information, Inner Mongolia Normal University, Hohhot 010022, China*

<sup>\*</sup>*Corresponding authors: E-mail: zhonghongxia@cug.edu.cn, jjshi@pku.edu.cn*

# 1. Calculation methods

## 1.1 DFT calculations

The highly efficient Vienna Ab-initio Simulation Package (VASP) based on the density functional theory (DFT) is employed in the first-principles calculations of the current anti-perovskite  $M_6CCh_4$  ( $M=Ca, Sr, Ba$ ;  $Ch=S, Se, Te$ ) [1]. The electronic exchange-correlation (XC) functional is treated based on the generalized gradient approximation (GGA) of Perdew-Burke-Ernzerhof (PBE) [2]. The ion-electron interactions are described by the projector augmented wave (PAW) method [3, 4]. The cutoff energy for the plane-wave basis is set to 500 eV. An  $11 \times 11 \times 11$  ( $13 \times 13 \times 13$ ) Monkhorst-Pack grid is chosen for structure optimization (self-consistent calculation) in the Brillouin zone of the primitive unit.

## 1.2. Modified Becke-Johnson (mBJ) potential

Considering that GGA-PBE approach always underestimates the bandgap, in order to obtain the realistic bandgap value, the computationally cheap modified Becke-Johnson (mBJ) potential [5] was employed. The mBJ potential  $v_{x,\sigma}^{mBJ}$  reads

$$v_{x,\sigma}^{mBJ}(r) = cv_{x,\sigma}^{BR}(r) + (3c - 2) \frac{1}{\pi} \sqrt{\frac{5}{12}} \sqrt{\frac{2t_\sigma(r)}{\rho_\sigma(r)}},$$

where  $\rho_\sigma(r)$  is the electron density, which is defined as

$$\rho_\sigma(r) = \sum_{i=1}^{N_\sigma} |\psi_{i,\sigma}|^2.$$

The kinetic-energy density  $t_\sigma(r)$  can be calculated by

$$t_\sigma(r) = (1/2) \sum_{i=1}^{N_\sigma} \psi_{i,\sigma}^* \nabla \psi_{i,\sigma},$$

here,  $\psi_{i,\sigma}$  is the one-electron wave functions.

The Becke-Roussel (BR) potential  $v_{x,\sigma}^{BR}(r)$  was proposed to model the Coulomb potential created by the exchange hole [6].

$$v_{x,\sigma}^{BR}(r) = -\frac{1}{b_\sigma(r)} \left( 1 - e^{-x_\sigma(r)} - \frac{1}{2} x_\sigma(r) e^{-x_\sigma(r)} \right),$$

here,  $x_\sigma(r)$  is determined from a nonlinear equation involving  $\rho_\sigma$ ,  $\nabla \rho_\sigma$ ,  $\nabla^2 \rho_\sigma$ , and  $t_\sigma$ , and then  $b_\sigma(r)$  is calculated by

$$b_\sigma(r) = [x_\sigma^3(r) e^{-x_\sigma(r)} / (8\pi \rho_\sigma(r))]^{1/3},$$

$$c = \alpha + \beta \left( \frac{1}{V_{cell}} \int_{cell} \frac{|\nabla \rho(r')|}{\rho(r')} d^3 r' \right)^{1/2},$$

here,  $V_{cell}$  is the unit cell volume. The parameters  $\alpha$  and  $\beta$  can be modified to match with the accurate energy gap value.

### 1.3. Carrier mobility

According to Feynman et al. [7, 8], the carrier mobility  $\mu$  can be obtained using the following formula [9, 10]

$$\mu = \frac{3e}{2\sqrt{\pi}c\omega_{LO}m^*\alpha} \frac{\sinh(\beta/2)}{\beta^{5/2}} \frac{\omega^3}{v^3} \frac{1}{K},$$

where  $e$  is the electron charge and  $c$  is the speed of light in the vacuum.

The effective mass  $m^*$  can be approximately defined by a quadratic relationship of the energy dispersion  $m^* = \hbar^2[\partial^2 E(k)/\partial k^2]^{-1}$  at the bottom of the conduction band (top of the valence band).  $\omega_{LO}$  is the average LO phonon frequency, which can be obtained by solving the following equation

$$\frac{W^2}{\omega_{LO}} \coth\left(\frac{\hbar c \omega_{LO}}{2k_B T}\right) = \sum_{i=1}^n \frac{W_i^2}{\omega_{LO,i}} \left(\frac{\hbar c \omega_{LO,i}}{2k_B T}\right),$$

here,  $h$  is the Planck constant,  $k_B$  is the Boltzmann constant, and  $T$  is the temperature.  $W^2 = \sum_{i=1}^n W_i^2$ ,  $W_i$  is the oscillator strength of the  $i$ -th LO phonon branch, in accordance with Hellwarth and Biaggio,  $W_i$  can be calculated by

$$W_i^2 = \frac{1}{\epsilon_\infty} (\omega_{LO,i}^2 - \omega_{TO,i}^2).$$

The parameter  $\alpha = \frac{1}{\epsilon^*} \sqrt{\frac{R_y}{ch\omega_{LO}}} \sqrt{m^*}$  is the Fröhlich electron-phonon coupling constant,

here,  $R_y$  is the Rydberg energy, and  $\frac{1}{\epsilon^*}$  is the ionic screening parameter, which can be

obtained by  $\frac{1}{\epsilon^*} = \frac{1}{\epsilon_\infty} - \frac{1}{\epsilon_0}$ . Here,  $\epsilon_\infty$  ( $\epsilon_0$ ) is the high-frequency (static) dielectric

constant. The calculated dielectric functions of  $\text{Ca}_6\text{CSe}_4$  and  $\text{Sr}_6\text{CSe}_4$  are exhibited in Figure S11.  $\beta$  can be calculated by  $\beta = \hbar c \omega_{LO}/k_B T$ . Both  $\omega$  and  $v$  could be found by minimizing the free polaron energy  $F$  [11]:

$$F = -(A + B + C),$$

$$A = \frac{3}{\beta} \left[ \ln\left(\frac{v}{\omega}\right) - \frac{\ln(2\pi\beta)}{2} - \ln\left(\frac{\sinh(v\beta/2)}{\sinh(\omega\beta/2)}\right) \right],$$

$$B = \frac{\alpha v}{\sqrt{\pi}[\exp(\beta)-1]} \int_0^{\beta/2} \frac{\exp(\beta-x)+\exp(x)}{\sqrt{\omega^2 x(1-x/\beta)+Y(x)(v^2-\omega^2)/v}} dx,$$

$$Y(x) = \frac{1}{1-\exp(-v\beta)} \{1 + \exp(-v\beta) - \exp(-vx) - \exp(v[x - \beta])\},$$

$$C = \frac{3(v^2-\omega^2)}{4v} \left[ \coth\left(\frac{v\beta}{2}\right) - \frac{2}{v\beta} \right].$$

The parameter  $K$  is a function of  $\beta$  and the temperature-dependent variational parameters  $\omega$  and  $v$  [9, 10, 12] shown in the following formula:

$$K(a, b) = \int_0^\infty \frac{\cos(u)}{[u^2+a^2-b\cos(vu)]^{3/2}} du,$$

$$a^2 = \left(\frac{\beta}{2}\right)^2 + R\beta \coth\left(\frac{\beta v}{2}\right),$$

$$b = \frac{R\beta}{\sinh(\beta v/2)},$$

$$R = \frac{v^2-\omega^2}{\omega^2 v}.$$

#### 1.4. Optical absorption

To investigate the optical properties, we calculate the frequency-dependent dielectric matrix in the long-wavelength limit ( $q \rightarrow 0$ ) using the sum over states approach [13]. In this case, the imaginary part of the dielectric function can be calculated by

$$\varepsilon_{\alpha\beta}^{(2)}(\omega) = \frac{4\pi^2 e^2}{\Omega} \lim_{q \rightarrow 0} \frac{1}{q^2} \sum_{c,v,k} 2\omega_k \delta(\varepsilon_{ck} - \varepsilon_{vk} - \omega) \times \langle u_{ck+\hat{e}_\alpha q} | u_{vk} \rangle \langle u_{vk+\hat{e}_\beta q} | u_{vk} \rangle^*,$$

where  $c$  and  $v$  represent the unoccupied and occupied bands,  $q$  is the wave number of the incident electromagnetic wave,  $\Omega$  is the volume of the structure cell,  $u_{ck}$  ( $u_{vk}$ ) is the periodic part of the orbitals at the  $k$ -point, and  $\hat{e}_\alpha$  ( $\hat{e}_\beta$ ) represents the unit vector along the  $\alpha$  ( $\beta$ ) direction.

By using the Kramers-Kronig relationship [14], the real part of the dielectric function can be obtained by the following expression

$$\varepsilon_{\alpha\beta}^{(1)}(\omega) = 1 + \frac{2}{\pi} P \int_0^\infty \frac{\varepsilon_{\alpha\beta}^{(2)}(\omega') \omega'}{\omega'^2 - \omega^2 + i\eta} d\omega'.$$

Then the interband optical absorption coefficient  $\alpha(\omega)$  can be calculated by the formula [15]

$$\alpha(\omega) = \sqrt{2}\omega \left[ \sqrt{\varepsilon^{(1)}(\omega)^2 + \varepsilon^{(2)}(\omega)^2} - \varepsilon^{(1)}(\omega) \right]^{1/2}.$$

#### 1.5. Melting point

The melting point  $T_0$  (in K) is estimated by the empirical relation of  $T_0 = 607 + 9.3B$  [16], where  $B$  (in GPa) is the bulk modulus. The bulk modulus can be obtained from corresponding elastic constants using Voigt-Reuss-Hill averaging [17-19] by using the VASPKIT code [20].

#### 1.6. Exciton binding energy

The exciton binding energy  $E_b$  can be estimated by the Wannier model [21] of  $E_b = R_y \frac{\mu^*}{\varepsilon_\infty^2}$ , where  $R_y = 13.56$  eV is the atomic Rydberg energy,  $\mu^*$  is the reduced exciton

mass, which is calculated by  $\frac{1}{\mu^*} = \frac{1}{m_e} + \frac{1}{m_h}$ , and  $\varepsilon_\infty$  is the high-frequency dielectric constant.

#### 1.7. Theoretical power conversion efficiency

The power conversion efficiency (PCE)  $\eta$  of a single-junction solar cell is defined as

$$\eta = P_m / P_{in},$$

where  $P_{in}$  is the total incident solar energy density (AM 1.5G), and  $P_m$  is the maximum output power density, which can be obtained by

$$P_m = I_m V_m = I_{sc} V_{oc} FF,$$

where  $I_m$  ( $V_m$ ) is the maximum current density (voltage),  $I_{sc}$  is the short-circuit current density,  $V_{oc}$  is the open-circuit voltage, and  $FF$  is the fill factor. The current density-voltage relationship, *i.e.*  $I$ - $V$  curve can be obtained by [22, 23]

$$I = I_{sc} - I_0 [\exp(eV/K_B T) - 1],$$

here,  $K_B$  is the Boltzmann constant, and the short-circuit current density  $I_{sc}$  can be obtained by

$$I_{sc} = e \int_0^{\infty} a(E) I_{sun}(E) dE.$$

The photon absorptivity  $a(E)$  is defined as  $a(E) = 1 - e^{-2\alpha(E)L}$ , where  $L$  is the thickness of the absorber layer with a zero-reflectivity front surface and unity-reflectivity back surface, and  $\alpha(E)$  ( $\alpha(\omega)$ ) is the optical absorption coefficient calculated by using the first-principles method.  $I_{sun}(E)$  is the AM 1.5G standard photon flux at temperature  $T$ . The reverse saturation current  $I_0$  is given by

$$I_0 = I_0^r + I_0^{nr} = I_0^r / f_r,$$

where  $I_0^r$  and  $I_0^{nr}$  are radiative and nonradiative parts, respectively. The fraction of the radiative electron-hole recombination current  $f_r$  can be described by

$$f_r = e^{-\Delta/K_B T} = e^{-(E_g^{da} - E_g)/K_B T},$$

here,  $E_g^{da}$  is the minimum allowed bandgap and depends on the transition mechanism of solar absorber. As for the anti-perovskite  $\text{Ca}_6\text{CSe}_4$  and  $\text{Sr}_6\text{CSe}_4$ , they are direct-band-gap compounds with parity-allowed transition between the CBM and VBM, which means  $E_g^{da} = E_g$ , then the parameter  $f_r$  would be 1. Therefore, the reverse saturation current  $I_0$  can be calculated by

$$I_0 = I_0^r = e \int_0^{\infty} a(E) I_{bb}(E, T) dE,$$

here,  $I_{bb}(E, T)$  is black-body spectrum at temperature  $T$ .

### 1.8. Concentrator solar cells

In concentrator photovoltaic systems, the concentration ratio  $X$  of the solar radiation incident onto the cell represents how many times the solar light is focused and is commonly referred to as ‘suns’ [24].

At 1sun, the PCE  $\eta^{1sun}$  can be defines as

$$\eta^{1sun} = \frac{I_{sc}^{1sun} V_{oc}^{1sun} FF^{1sun}}{P_{in}^{1sun}},$$

here,  $P_{in}^{1sun}$  is the total incident solar energy density (AM 1.5D standard photon flux).  $V_{oc}^{1sun}$ ,  $I_{sc}^{1sun}$ , and  $FF^{1sun}$  indicate the short-circuit current density, open-circuit voltage, and fill factor, respectively, and could be gained using the above-mentioned approach.

At  $X$  suns, the short-circuit current density can be obtained by  $I_{sc}^{Xsuns} = X I_{sc}^{1sun}$ . The open-circuit voltage is received by

$$V_{oc}^{Xsuns} = V_{oc}^{1sun} + \frac{k_B T}{e} \ln X,$$

then the fill factor could be calculated from the corresponding open-circuit voltage  $V_{oc}^{Xsuns}$  by using the following formula

$$FF^{Xsuns} = \frac{V_{oc}^{Xsuns} - \frac{k_B T}{e} \ln [e V_{oc}^{Xsuns} / k_B T + 0.72]}{V_{oc}^{Xsuns} + \frac{k_B T}{e}}.$$

Given the short-circuit current density, open-circuit voltage, and fill factor, the PCE at X suns can be gained as

$$\eta^{Xsuns} = \frac{I_{SC}^{Xsuns} V_{OC}^{Xsuns} FF^{Xsuns}}{P_{in}^{Xsuns}} = \eta^{1sun} \left( \frac{FF^{Xsuns}}{FF^{1sun}} \right) \left( 1 + \frac{k_B T}{e V_{OC}^{1sun}} \ln X \right),$$

here, the total incident solar energy density  $P_{in}^{Xsuns}$  is calculated by  $P_{in}^{Xsuns} = X P_{in}^{1sun}$

## 2. Crystal structure and stability

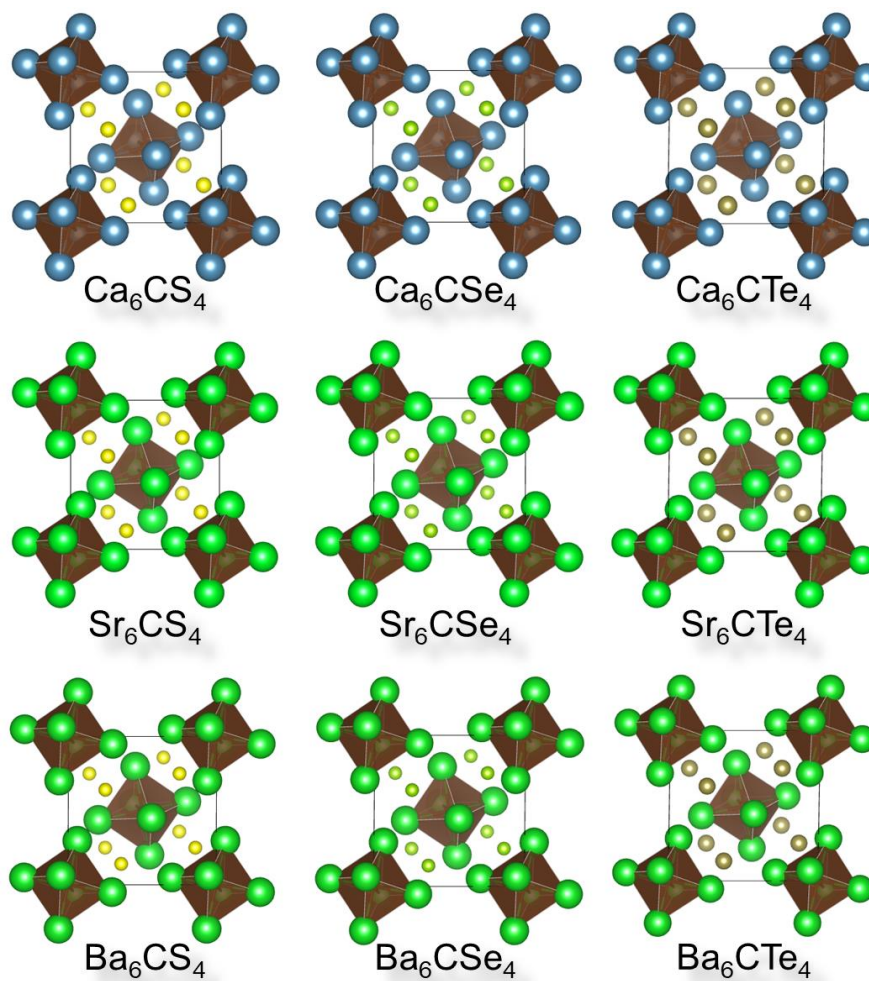

**Figure S1** Relaxed rhombohedral lattice of  $M_6CCh_4$  ( $M$ =Ca, Sr, Ba;  $Ch$ =S, Se, Te) anti-perovskites.

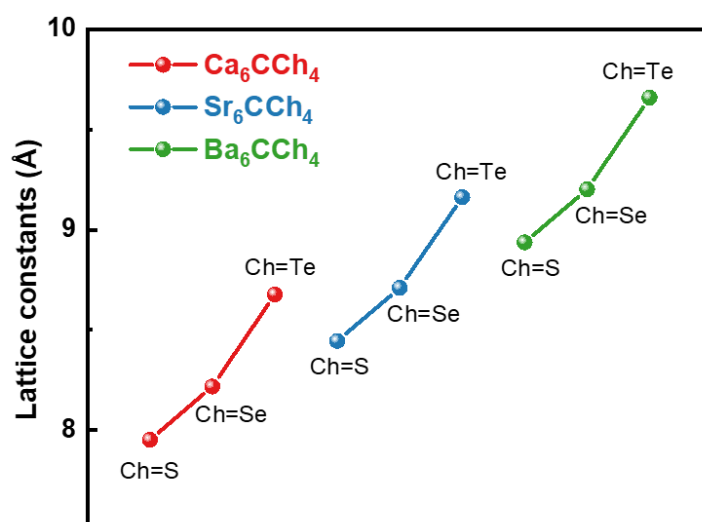

**Figure S2** Lattice constants of  $M_6CCh_4$  ( $M$ =Ca, Sr, Ba;  $Ch$ =S, Se, Te) anti-perovskites.

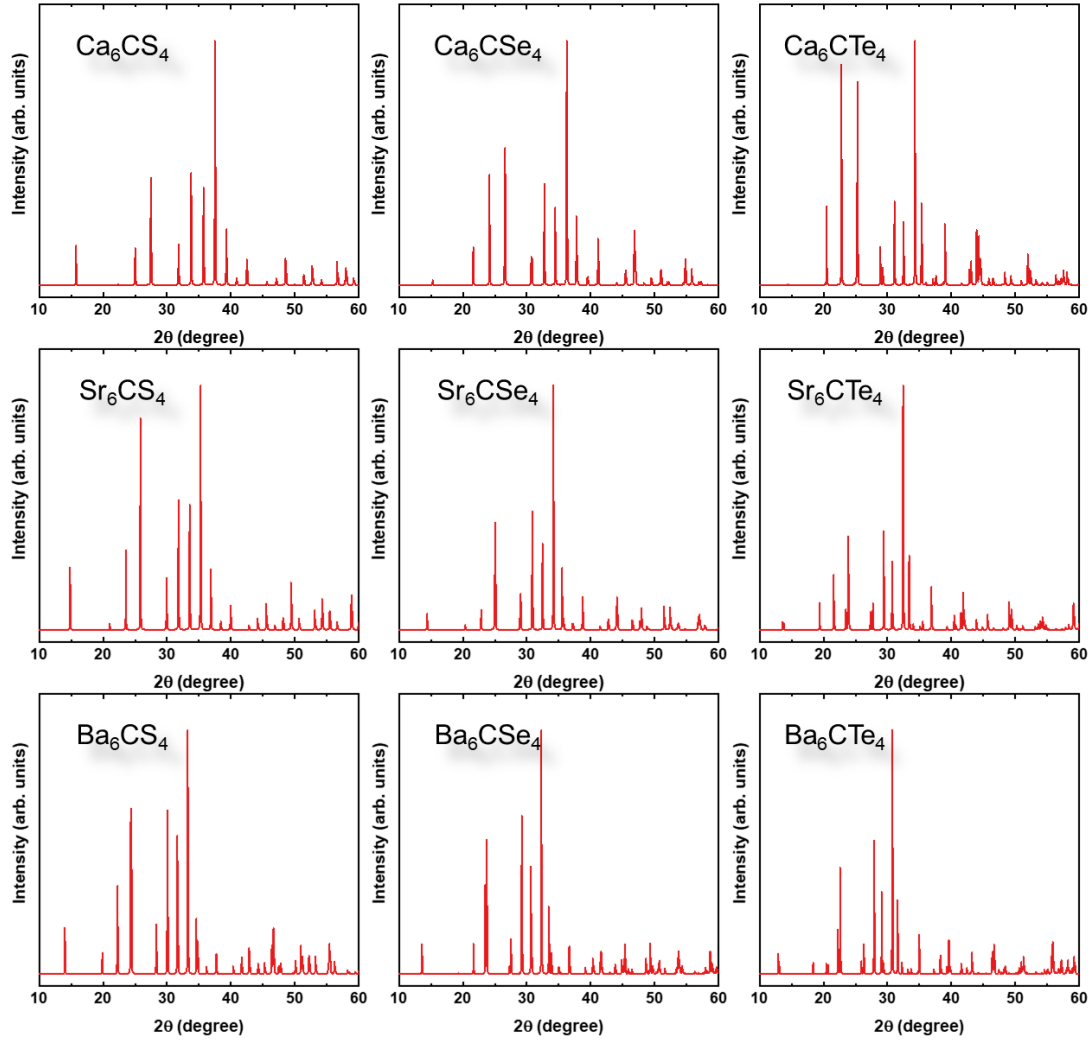

**Figure S3** X-ray diffraction (XRD) spectra of  $M_6CCh_4$  ( $M=Ca, Sr, Ba$ ;  $Ch=S, Se, Te$ ) anti-perovskites, in which the angular range and the radiation wavelength are chosen to be  $10^\circ$ - $60^\circ$  and  $\lambda=1.54184$  (Cu- $K_\alpha$ ), respectively.

**Table S1** Several possible and stable decomposition compounds of  $M_6CCh_4$  ( $M=Ca, Sr, Ba$ ;  $Ch=S, Se, Te$ ) anti-perovskites are listed. Their structural formula and identification number (ID) are collected from the Materials Project [20].

| Formula           | ID         | Formula          | ID         | Formula          | ID      | Formula          | ID         |
|-------------------|------------|------------------|------------|------------------|---------|------------------|------------|
| Ca                | mp-132     | Sr               | mp-1187073 | Ba               | mp-122  | C                | mp-569304  |
| S                 | mp-96      | Se               | mp-570481  | Te               | mp-19   | SrC <sub>6</sub> | mp-1208630 |
| BaC <sub>6</sub>  | mp-1214417 | CaS              | mp-1672    | CaSe             | mp-1415 | CaTe             | mp-1519    |
| SrS               | mp-1987    | SrS <sub>3</sub> | mp-1175    | SrSe             | mp-2758 | SrTe             | mp-1958    |
| BaS               | mp-1500    | BaS <sub>2</sub> | mp-684     | BaS <sub>3</sub> | mp-239  | BaSe             | mp-1253    |
| BaSe <sub>2</sub> | mp-7547    | BaTe             | mp-1000    |                  |         |                  |            |



**Table S2** Estimated melting point  $T_0$  [16], decomposition paths and corresponding decomposition energy of  $M_6CCh_4$  ( $M=Ca, Sr, Ba$ ;  $Ch=S, Se, Te$ ) anti-perovskites. The decomposition energy is obtained by the difference between the total energy of all decomposition compounds and that of  $M_6CCh_4$ . The positive decomposition energy indicates that  $M_6CCh_4$  is stable due to the prohibited decomposition path.

| Compound    | $T_0$ (K) | Decomposition path                                      | Decomposition energy (eV/atom) |
|-------------|-----------|---------------------------------------------------------|--------------------------------|
| $Ca_6CS_4$  | 1026      | $Ca_6CS_4 \xrightarrow{T \geq T_0} 4CaS+2Ca+C$          | -0.20                          |
| $Ca_6CSe_4$ | 988       | $Ca_6CSe_4 \xrightarrow{T \geq T_0} 4CaSe+2Ca+C$        | -0.14                          |
| $Ca_6CTe_4$ | 923       | $Ca_6CTe_4 \xrightarrow{T \geq T_0} 4CaTe+2Ca+C$        | -0.07                          |
| $Sr_6CS_4$  | 951       | $Sr_6CS_4 \xrightarrow{T \geq T_0} 4SrS+2Sr+C$          | -0.27                          |
|             |           | $3Sr_6CS_4 \rightarrow 4SrS_3+14Sr+3C$                  | 0.80                           |
|             |           | $6Sr_6CS_4 \xrightarrow{T \geq T_0} 24SrS+SrC_6+11Sr$   | -0.27                          |
|             |           | $6Sr_6CS_4 \rightarrow 8SrS_3+SrC_6+27Sr$               | 0.79                           |
| $Sr_6CSe_4$ | 923       | $Sr_6CSe_4 \xrightarrow{T \geq T_0} 4SrSe+2Sr+C$        | -0.21                          |
|             |           | $6Sr_6CSe_4 \xrightarrow{T \geq T_0} 24SrSe+SrC_6+11Sr$ | -0.21                          |
| $Sr_6CTe_4$ | 877       | $Sr_6CTe_4 \xrightarrow{T \geq T_0} 4SrTe+2Sr+C$        | -0.14                          |
|             |           | $6Sr_6CTe_4 \xrightarrow{T \geq T_0} 24SrTe+SrC_6+11Sr$ | -0.15                          |
| $Ba_6CS_4$  | 905       | $Ba_6CS_4 \xrightarrow{T \geq T_0} 4BaS+2Ba+C$          | -0.24                          |
|             |           | $Ba_6CS_4 \rightarrow 2BaS_2+4Ba+C$                     | 0.50                           |
|             |           | $3Ba_6CS_4 \rightarrow 4BaS_3+14Ba+3C$                  | 0.76                           |
|             |           | $6Ba_6CS_4 \xrightarrow{T \geq T_0} 24BaS+BaC_6+11Ba$   | -0.25                          |
|             |           | $6Ba_6CS_4 \rightarrow 12BaS_2+BaC_6+23Ba$              | 0.49                           |
| $Ba_6CSe_4$ | 867       | $Ba_6CSe_4 \xrightarrow{T \geq T_0} 4BaSe+2Ba+C$        | -0.20                          |
|             |           | $Ba_6CSe_4 \rightarrow 2BaSe_2+4Ba+C$                   | 0.53                           |
|             |           | $6Ba_6CSe_4 \xrightarrow{T \geq T_0} 24BaSe+BaC_6+11Ba$ | -0.21                          |
|             |           | $6Ba_6CSe_4 \rightarrow 12BaSe_2+BaC_6+23Ba$            | 0.52                           |
|             |           | $Ba_6CTe_4 \xrightarrow{T \geq T_0} 4BaTe+2Ba+C$        | -0.15                          |
| $Ba_6CTe_4$ | 830       | $6Ba_6CTe_4 \xrightarrow{T \geq T_0} 24BaTe+BaC_6+11Ba$ | -0.16                          |

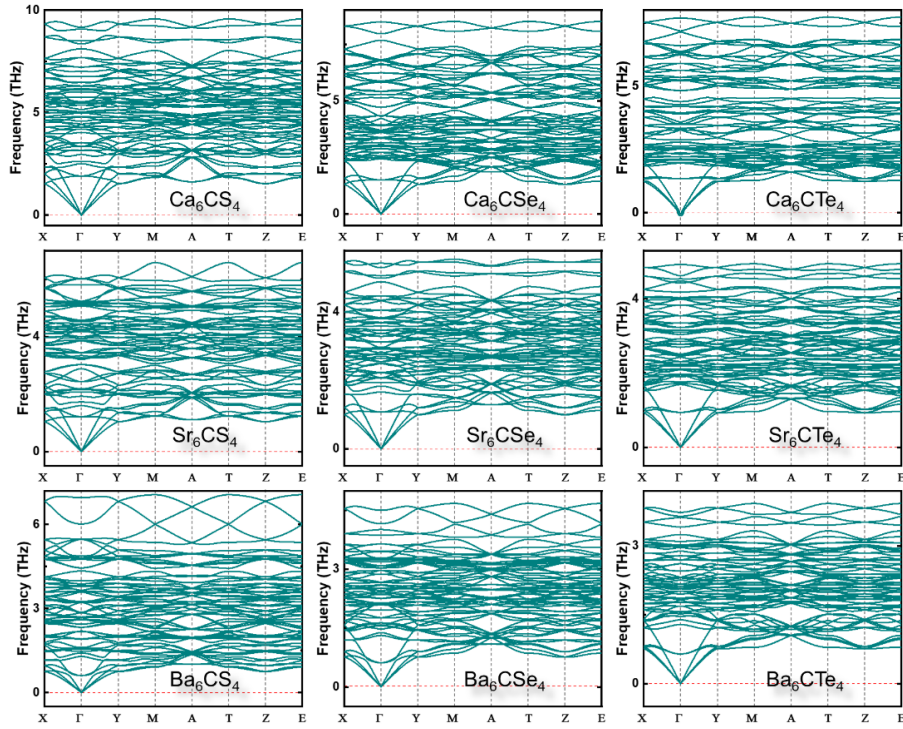

**Figure S4** Phonon spectra of  $M_6CCh_4$  ( $M=Ca, Sr, Ba$ ;  $Ch=S, Se, Te$ ) anti-perovskites at room temperature.

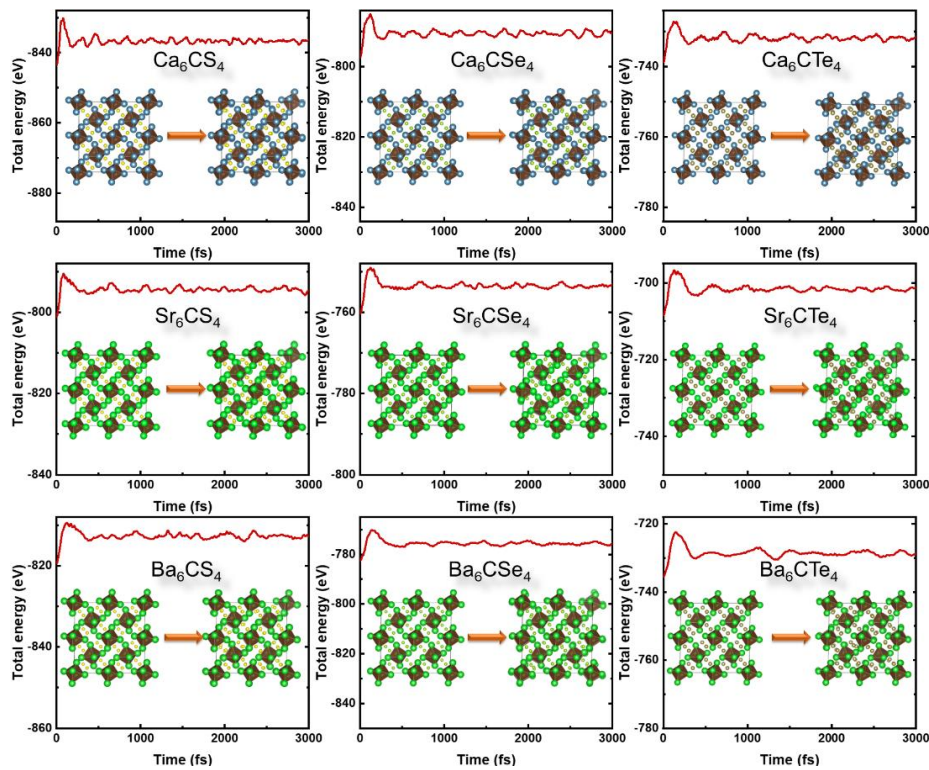

**Figure S5** Fluctuation of the total energy of  $M_6CCh_4$  ( $M=Ca, Sr, Ba$ ;  $Ch=S, Se, Te$ ) anti-perovskites during the Ab initio molecular dynamics (AIMD) simulation at 300 K within 3000 fs. The inset is the crystal structures before (the left) and after (the right) AIMD.

### 3. Electronic properties

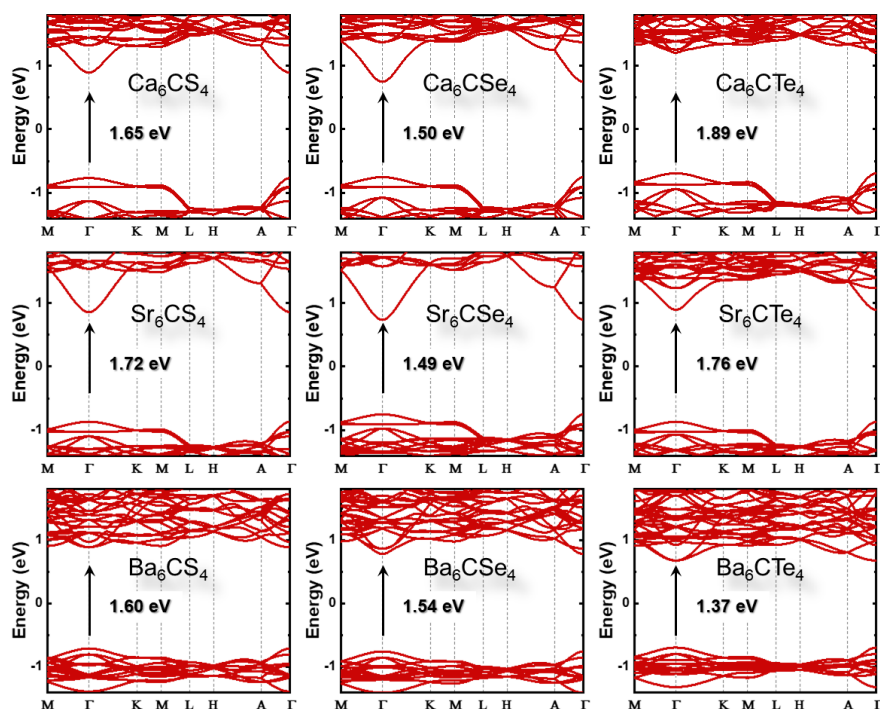

**Figure S6** PBE band structures of  $M_6CCh_4$  ( $M=Ca, Sr, Ba$ ;  $Ch=S, Se, Te$ ) anti-perovskites, in which the energy gaps are revised by the mBJ potential.

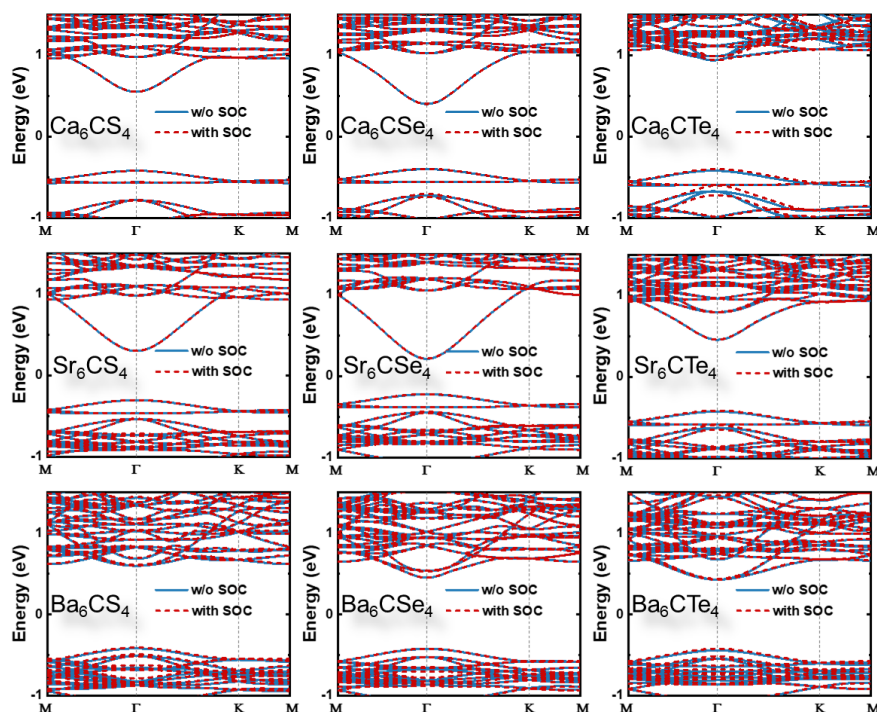

**Figure S7** PBE band structures of  $M_6CCh_4$  ( $M=Ca, Sr, Ba$ ;  $Ch=S, Se, Te$ ) anti-perovskites without (w/o) (blue solid lines) and with (red dashed lines) spin-orbit coupling (SOC) effect into consideration.

**Table S3** Bader net charges in  $M_6CCh_4$  ( $M=Ca, Sr, Ba$ ;  $Ch=S, Se, Te$ ) anti-perovskites. The positive (negative) charge value indicates that the corresponding atom loses (gains) electrons.

| Compound   | Species | Charge | Compound    | Species | Charge | Compound    | Species | Charge |
|------------|---------|--------|-------------|---------|--------|-------------|---------|--------|
| $Ca_6CS_4$ | Ca      | 1.372  | $Ca_6CSe_4$ | Ca      | 1.362  | $Ca_6CTe_4$ | Ca      | 1.351  |
|            | C       | -2.118 |             | C       | -2.158 |             | C       | -2.196 |
|            | S       | -1.528 |             | Se      | -1.504 |             | Te      | -1.477 |
| $Sr_6CS_4$ | Sr      | 1.364  | $Sr_6CSe_4$ | Sr      | 1.354  | $Sr_6CTe_4$ | Sr      | 1.343  |
|            | C       | -2.081 |             | C       | -2.113 |             | C       | -2.143 |
|            | S       | -1.526 |             | Se      | -1.503 |             | Te      | -1.479 |
| $Ba_6CS_4$ | Ba      | 1.282  | $Ba_6CSe_4$ | Ba      | 1.267  | $Ba_6CTe_4$ | Ba      | 1.253  |
|            | C       | -1.859 |             | C       | -1.882 |             | C       | -1.911 |
|            | S       | -1.458 |             | Se      | -1.429 |             | Te      | -1.403 |

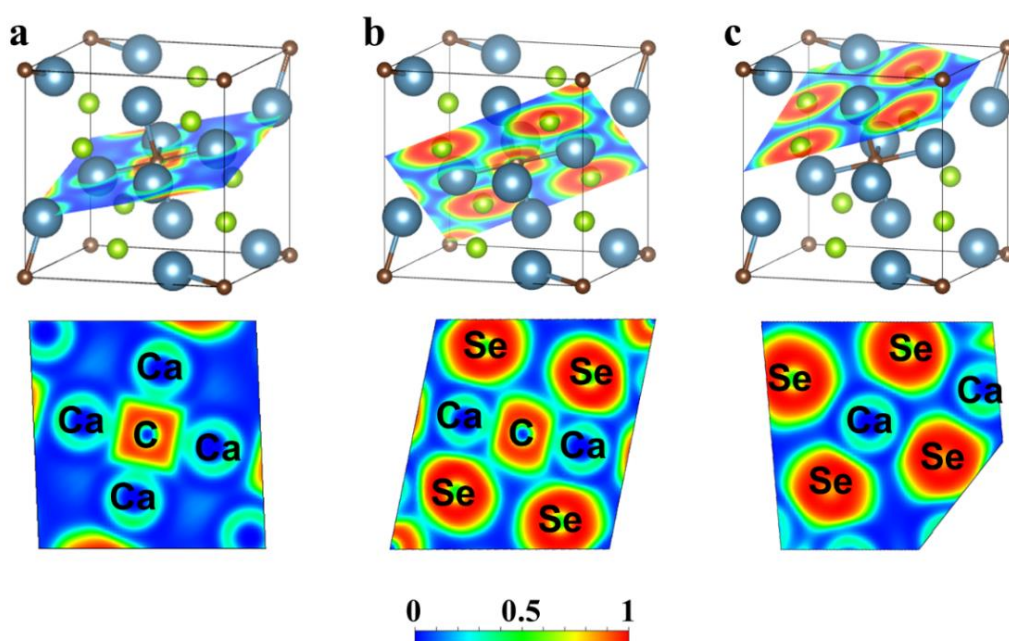

**Figure S8** Electron localization function in  $Ca_6CSe_4$  anti-perovskite.

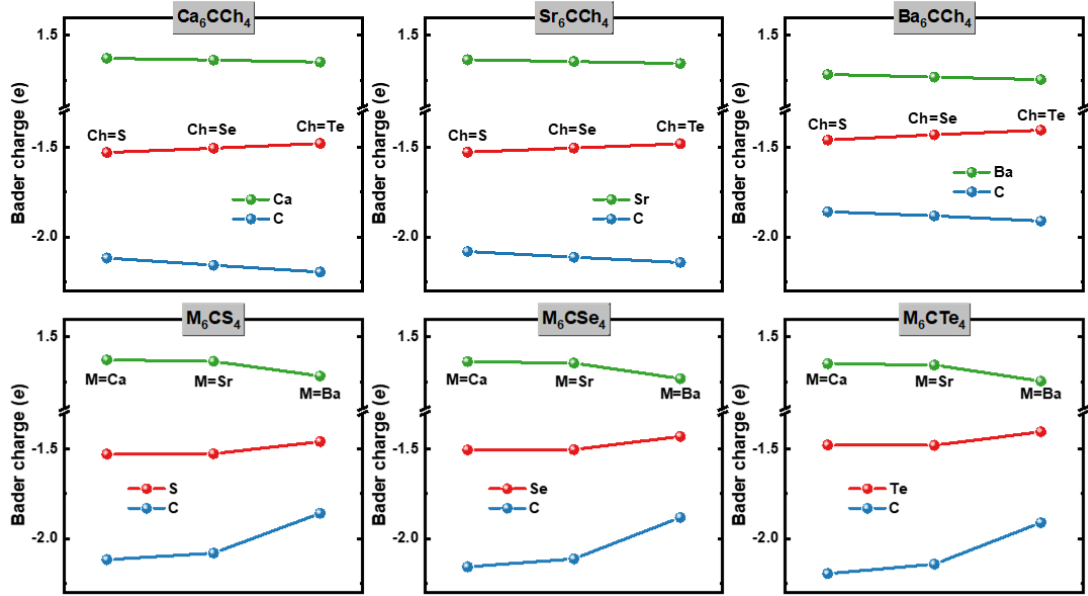

**Figure S9** Variation of Bader net charges in  $M_6CCh_4$  ( $M=Ca, Sr, Ba$ ;  $Ch=S, Se, Te$ ) anti-perovskites.

**Table S4** Quantitative data corresponding to partial charge densities at VBM, CBM, and CB2 ( $\Gamma$ -point) in  $Ca_6CSe_4$  anti-perovskite. The element site is labeled in Figure S10 (b).

| Energy level    | Element type | Element site     | Orbital distribution ratio (%) |           |           |       |
|-----------------|--------------|------------------|--------------------------------|-----------|-----------|-------|
|                 |              |                  | s                              | p         | d         | Total |
| VBM             | Ca           | Ca1-Ca12         | 0                              | 1         | 3         | 4     |
|                 | C            | C1/C2            | 0                              | <b>18</b> | -         | 18    |
|                 | Se           | Se1/Se2          | 0                              | <b>6</b>  | 0         | 6     |
|                 |              | Se3-Se8          | 0                              | 1         | 0         | 1     |
| CBM             | Ca           | Ca1-Ca12         | <b>4</b>                       | 1         | 1         | 6     |
|                 | C            | C1/C2            | 1                              | 0         | -         | 1     |
|                 | Se           | Se1/Se2          | <b>3</b>                       | 0         | 0         | 3     |
|                 |              | Se3-Se8          | <b>4</b>                       | 0         | 0         | 4     |
| CB2             | Ca           | Ca1/Ca5/Ca7/Ca12 | 0                              | 0         | <b>6</b>  | 6     |
|                 |              | Ca2/Ca4/Ca8/Ca10 | 0                              | 0         | <b>8</b>  | 8     |
|                 |              | Ca3/Ca9          | 0                              | 0         | <b>9</b>  | 9     |
|                 |              | Ca6/Ca11         | 0                              | 0         | <b>10</b> | 10    |
|                 | C            | C1/C2            | 0                              | 0         | -         | 0     |
|                 | Se           | Se1/Se2/Se5/Se8  | 0                              | 0         | 0         | 0     |
| Se3/Se4/Se6/Se7 |              | 0                | 0                              | 1         | 1         |       |



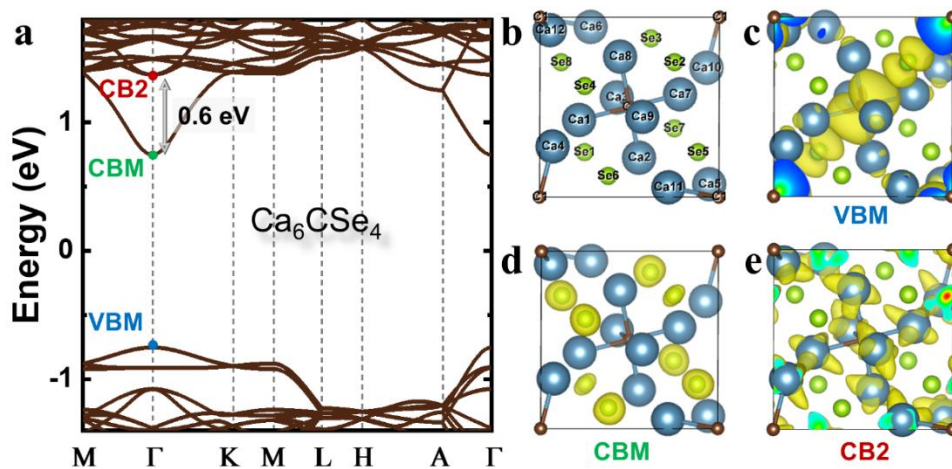

**Figure S10** (a) Band structure of  $\text{Ca}_6\text{CSe}_4$  anti-perovskite, in which the energy positions indicating VBM, CBM, and CB2 are labeled. The energy difference between the CBM and CB2 is 0.6 eV approximately. (b) The crystal structure of  $\text{Ca}_6\text{CSe}_4$ , in which the element sites are marked. The isosurface plot of real space charge distribution at (c) VBM, (d) CBM, and (e) CB2 ( $\Gamma$ -point) in  $\text{Ca}_6\text{CSe}_4$ . The isosurface value is  $0.0015 \text{ e} \text{ \AA}^{-3}$ .

## 4. Transport properties

**Table S5** Carrier effective mass  $m^*$ , ionic screening parameter  $1/\epsilon^*$ , electron-phonon coupling constant  $\alpha$ , and carrier mobility  $\mu$  of  $M_6CCh_4$  (M=Ca, Sr, Ba; Ch=S, Se, Te) anti-perovskites along  $\Gamma$ -M,  $\Gamma$ -K, and  $\Gamma$ -A paths, in which  $e$  and  $h$  indicate electron and hole, respectively.

| Compound                         | $1/\epsilon^*$ | $k$ -path   | Carrier            |          |                                                      |                    |          |                                                      |
|----------------------------------|----------------|-------------|--------------------|----------|------------------------------------------------------|--------------------|----------|------------------------------------------------------|
|                                  |                |             | $e$                |          |                                                      | $h$                |          |                                                      |
|                                  |                |             | $m^*$<br>( $m_0$ ) | $\alpha$ | $\mu$<br>( $\text{cm}^2\text{V}^{-1}\text{s}^{-1}$ ) | $m^*$<br>( $m_0$ ) | $\alpha$ | $\mu$<br>( $\text{cm}^2\text{V}^{-1}\text{s}^{-1}$ ) |
| MAPbI <sub>3</sub>               | 0.17           | -           | 0.104              | 1.72     | 197                                                  | 0.104              | 1.72     | 197                                                  |
| Ca <sub>6</sub> CS <sub>4</sub>  | 0.09           | $\Gamma$ -M | 0.28               | 0.88     | 127                                                  | 1.95               | 2.33     | 5                                                    |
|                                  |                | $\Gamma$ -K | 0.29               | 0.90     | 121                                                  | 1.97               | 2.34     | 5                                                    |
|                                  |                | $\Gamma$ -A | 0.31               | 0.93     | 109                                                  | 0.24               | 0.82     | 163                                                  |
| Ca <sub>6</sub> CSe <sub>4</sub> | 0.07           | $\Gamma$ -M | 0.21               | 0.74     | 210                                                  | 1.63               | 2.07     | 8                                                    |
|                                  |                | $\Gamma$ -K | 0.22               | 0.76     | 195                                                  | 1.67               | 2.09     | 7                                                    |
|                                  |                | $\Gamma$ -A | 0.21               | 0.74     | 210                                                  | 0.20               | 0.72     | 226                                                  |
| Ca <sub>6</sub> CTe <sub>4</sub> | 0.06           | $\Gamma$ -M | 0.24               | 0.70     | 201                                                  | 1.30               | 1.64     | 14                                                   |
|                                  |                | $\Gamma$ -K | 0.24               | 0.70     | 201                                                  | 1.34               | 1.66     | 13                                                   |
|                                  |                | $\Gamma$ -A | 0.19               | 0.63     | 289                                                  | 0.20               | 0.64     | 264                                                  |
| Sr <sub>6</sub> CS <sub>4</sub>  | 0.08           | $\Gamma$ -M | 0.23               | 0.85     | 162                                                  | 1.73               | 2.34     | 6                                                    |
|                                  |                | $\Gamma$ -K | 0.24               | 0.87     | 150                                                  | 1.78               | 2.37     | 6                                                    |
|                                  |                | $\Gamma$ -A | 0.23               | 0.85     | 162                                                  | 0.23               | 0.85     | 162                                                  |
| Sr <sub>6</sub> CSe <sub>4</sub> | 0.07           | $\Gamma$ -M | 0.18               | 0.74     | 255                                                  | 1.55               | 2.17     | 8                                                    |
|                                  |                | $\Gamma$ -K | 0.19               | 0.76     | 232                                                  | 1.58               | 2.20     | 8                                                    |
|                                  |                | $\Gamma$ -A | 0.16               | 0.70     | 306                                                  | 0.17               | 0.72     | 279                                                  |
| Sr <sub>6</sub> CTe <sub>4</sub> | 0.06           | $\Gamma$ -M | 0.20               | 0.76     | 238                                                  | 1.29               | 1.92     | 12                                                   |
|                                  |                | $\Gamma$ -K | 0.21               | 0.78     | 220                                                  | 1.29               | 1.92     | 12                                                   |
|                                  |                | $\Gamma$ -A | 0.18               | 0.72     | 279                                                  | 1.29               | 1.92     | 12                                                   |
| Ba <sub>6</sub> CS <sub>4</sub>  | 0.08           | $\Gamma$ -M | 0.70               | 1.58     | 26                                                   | 1.13               | 2.01     | 12                                                   |
|                                  |                | $\Gamma$ -K | 0.83               | 1.73     | 19                                                   | 1.17               | 2.05     | 11                                                   |
|                                  |                | $\Gamma$ -A | 0.86               | 1.76     | 18                                                   | 0.36               | 1.14     | 76                                                   |
| Ba <sub>6</sub> CSe <sub>4</sub> | 0.07           | $\Gamma$ -M | 0.24               | 0.98     | 148                                                  | 1.13               | 2.14     | 12                                                   |
|                                  |                | $\Gamma$ -K | 0.27               | 1.04     | 122                                                  | 1.16               | 2.16     | 11                                                   |
|                                  |                | $\Gamma$ -A | 0.24               | 0.98     | 148                                                  | 0.28               | 1.06     | 116                                                  |
| Ba <sub>6</sub> CTe <sub>4</sub> | 0.07           | $\Gamma$ -M | 0.45               | 1.30     | 61                                                   | 0.98               | 1.92     | 17                                                   |
|                                  |                | $\Gamma$ -K | 0.50               | 1.37     | 51                                                   | 0.99               | 1.93     | 17                                                   |
|                                  |                | $\Gamma$ -A | 0.86               | 1.80     | 21                                                   | 0.25               | 0.97     | 154                                                  |

**Table S6** Electronic (high-frequency)  $\epsilon_{elec}$ , ionic  $\epsilon_{ion}$ , and static  $\epsilon_0$  dielectric constants of  $M_6CCh_4$  (M=Ca, Sr, Ba; Ch=S, Se, Te) anti-perovskites.

| Compound                         | $\epsilon_{elec}$ | $\epsilon_{ion}$ | $\epsilon_0$ |
|----------------------------------|-------------------|------------------|--------------|
| MAPbI <sub>3</sub>               | 5.0               | 28.5             | 33.50        |
| Ca <sub>6</sub> CS <sub>4</sub>  | 7.43              | 12.7             | 20.13        |
| Ca <sub>6</sub> CSe <sub>4</sub> | 7.90              | 11               | 18.90        |
| Ca <sub>6</sub> CTe <sub>4</sub> | 8.48              | 8.8              | 17.28        |
| Sr <sub>6</sub> CS <sub>4</sub>  | 7.76              | 14.59            | 22.35        |
| Sr <sub>6</sub> CSe <sub>4</sub> | 8.26              | 11.91            | 20.17        |
| Sr <sub>6</sub> CTe <sub>4</sub> | 8.35              | 9.15             | 17.50        |
| Ba <sub>6</sub> CS <sub>4</sub>  | 8.64              | 21.12            | 29.76        |
| Ba <sub>6</sub> CSe <sub>4</sub> | 8.86              | 16.71            | 25.57        |
| Ba <sub>6</sub> CTe <sub>4</sub> | 9.04              | 12.94            | 21.98        |

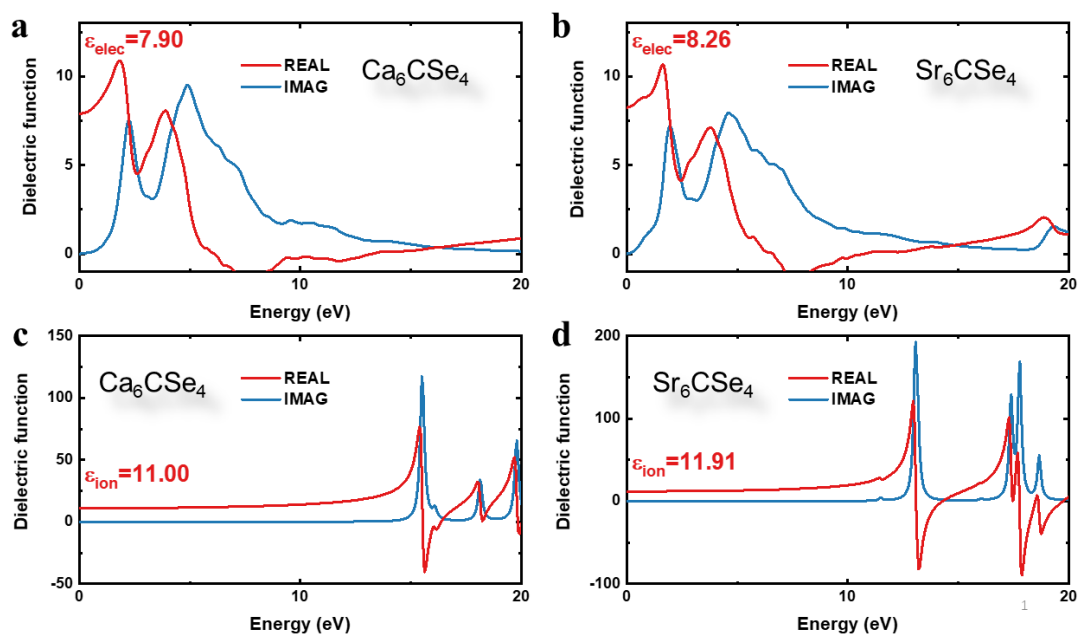

**Figure S11** Dielectric properties of (a, c) Ca<sub>6</sub>CSe<sub>4</sub> and (b, d) Sr<sub>6</sub>CSe<sub>4</sub> anti-perovskites. The calculated (a, b) electronic and (c, d) ionic contributions to the real and imaginary part of the dielectric function. The static dielectric constant  $\epsilon_0$  is calculated by  $\epsilon_0 = \epsilon_{elec} + \epsilon_{ion}$ .



## 5. Optical properties

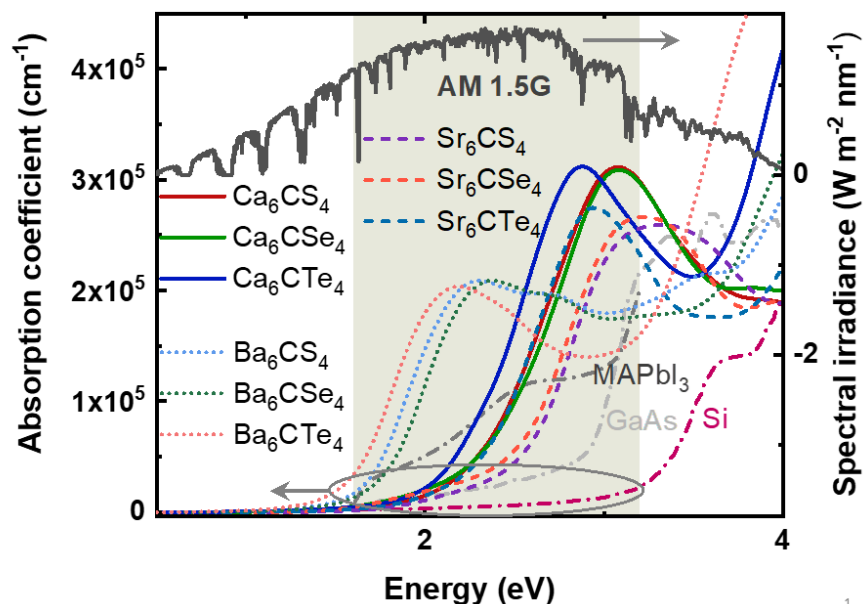

**Figure S12** Optical absorption coefficient of  $M_6CCh_4$  ( $M=Ca, Sr, Ba$ ;  $Ch=S, Se, Te$ ) anti-perovskites and those of photovoltaic compounds including Si, GaAs, and MAPbI<sub>3</sub>. The inset is the AM 1.5G spectrum. The dash area indicates the visible-light region.

**Table S7** Exciton binding energy  $E_b$  of  $M_6CCh_4$  ( $M=Ca, Sr, Ba$ ;  $Ch=S, Se, Te$ ) anti-perovskites. The reduced exciton mass  $\mu^*$  and high-frequency dielectric constant  $\epsilon_\infty$  are also listed.

| Compound                         | $\epsilon_\infty$ | $\mu^*$<br>( $m_0$ ) | $E_b$<br>(meV) |
|----------------------------------|-------------------|----------------------|----------------|
| Ca <sub>6</sub> CS <sub>4</sub>  | 7.43              | 0.24                 | 59             |
| Ca <sub>6</sub> CSe <sub>4</sub> | 7.90              | 0.18                 | 39             |
| Ca <sub>6</sub> CTe <sub>4</sub> | 8.48              | 0.18                 | 34             |
| Sr <sub>6</sub> CS <sub>4</sub>  | 7.76              | 0.20                 | 44             |
| Sr <sub>6</sub> CSe <sub>4</sub> | 8.26              | 0.15                 | 30             |
| Sr <sub>6</sub> CTe <sub>4</sub> | 8.35              | 0.16                 | 31             |
| Ba <sub>6</sub> CS <sub>4</sub>  | 8.64              | 0.42                 | 76             |
| Ba <sub>6</sub> CSe <sub>4</sub> | 8.86              | 0.19                 | 34             |
| Ba <sub>6</sub> CTe <sub>4</sub> | 9.04              | 0.33                 | 55             |

## 6. Theoretical power conversion efficiency

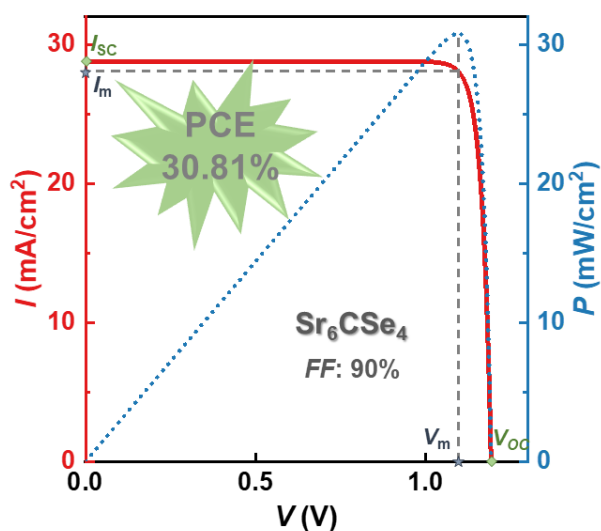

**Figure S13**  $I$ - $V$  and  $P$ - $V$  curves of the 3  $\mu\text{m}$ -thick  $\text{Sr}_6\text{CSe}_4$  anti-perovskite, and the corresponding parameters, such as the short-circuit current density  $I_{\text{sc}}$ , open-circuit voltage  $V_{\text{oc}}$ , maximum current density (voltage)  $I_{\text{m}}$  ( $V_{\text{m}}$ ), and fill factor  $FF$  are also given.

**Table S8** Calculated maximum current density  $I_{\text{m}}$  (voltage  $V_{\text{m}}$ ), short-circuit current density  $I_{\text{sc}}$ , open-circuit voltage  $V_{\text{oc}}$ , maximum output power density  $P_{\text{m}}$ , fill factor  $FF$ , and PCE of  $\text{Ca}_6\text{CSe}_4$  and  $\text{Sr}_6\text{CSe}_4$  anti-perovskites.

| Compound                  | Thickness ( $\mu\text{m}$ ) | $I_{\text{m}}$ ( $\text{mA}/\text{cm}^2$ ) | $V_{\text{m}}$ (V) | $I_{\text{sc}}$ ( $\text{mA}/\text{cm}^2$ ) | $V_{\text{oc}}$ (V) | $P_{\text{m}}$ ( $\text{mW}/\text{cm}^2$ ) | $FF$ (%) | PCE (%) |
|---------------------------|-----------------------------|--------------------------------------------|--------------------|---------------------------------------------|---------------------|--------------------------------------------|----------|---------|
| $\text{Ca}_6\text{CSe}_4$ | 3                           | 27.55                                      | 1.12               | 28.19                                       | 1.22                | 30.83                                      | 89       | 30.83   |
| $\text{Sr}_6\text{CSe}_4$ | 3                           | 28.13                                      | 1.10               | 28.79                                       | 1.20                | 30.81                                      | 90       | 30.81   |

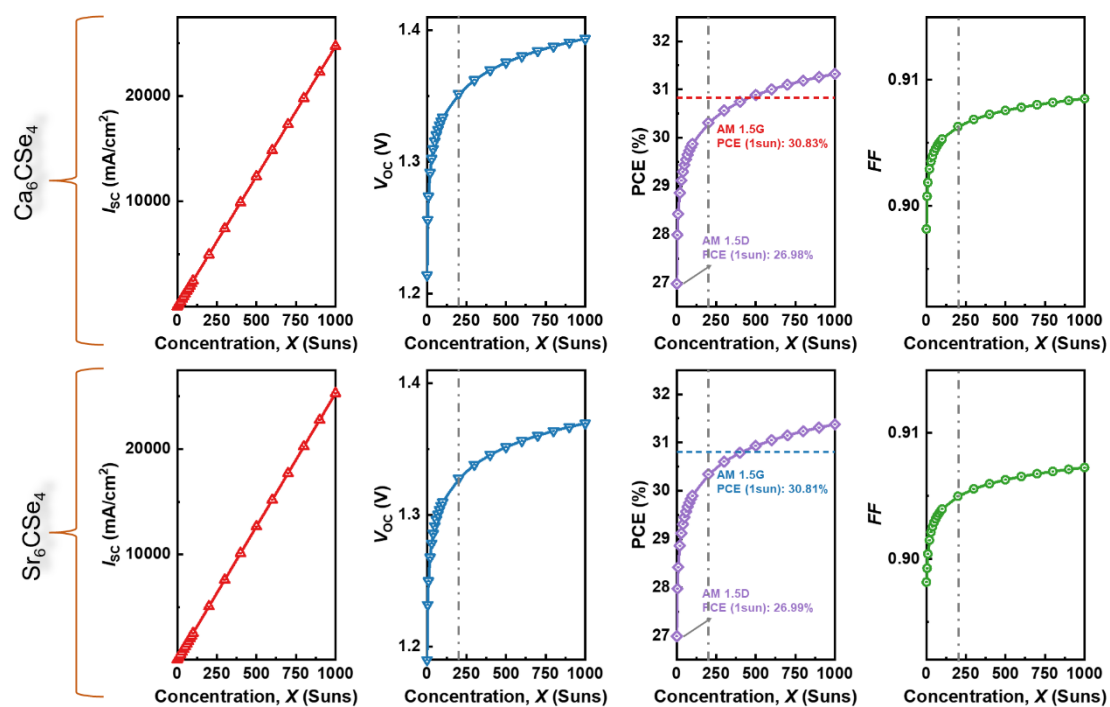

**Figure S14** Several vital parameters including the short-circuit current density  $I_{sc}$ , open-circuit voltage  $V_{oc}$ , PCE, and fill factor  $FF$  versus the concentration ratio  $X$  in 3  $\mu\text{m}$ -thick  $\text{Ca}_6\text{CSe}_4$  and  $\text{Sr}_6\text{CSe}_4$  anti-perovskites. The red and blue dashed lines indicate the PCE values of the 3  $\mu\text{m}$ -thick  $\text{Ca}_6\text{CSe}_4$  and  $\text{Sr}_6\text{CSe}_4$  under AM 1.5G spectral radiation, respectively.

## References

- [1] G. Kresse and J. Hafner, *Phys. Rev. B*, 1993, 47, 558-561.
- [2] J. P. Perdew, K. Burke and M. Ernzerhof, *Phys. Rev. Lett.*, 1996, 77, 3865-3868.
- [3] P. E. Blöchl, *Phys. Rev. B*, 1994, 50, 17953-17979.
- [4] G. Kresse and D. Joubert, *Phys. Rev. B*, 1999, 59, 1758-1775.
- [5] F. Tran and P. Blaha, *Phys. Rev. Lett.*, 2009, 102, 226401.
- [6] A. D. Becke and M. R. Roussel, *Phys. Rev. A*, 1989, 39, 3761–3767.
- [7] R. P. Feynman, *Phys. Rev.*, 1955, 97, 660-665.
- [8] R. P. Feynman, R. W. Hellwarth, C. K. Iddings and P. M. Platzman, *Phys. Rev.*, 1962, 127, 1004-1017.
- [9] M. Sendner, P. K. Nayak, D. A. Egger, S. Beck, C. Müller, B. Epping, W. Kowalsky, L. Kronik and H. J. Snaith, A. Pucci and R. Lovrinčić, *Mater. Horiz.*, 2016, 3, 613-620.
- [10] I. Biaggio, R. W. Hellwarth and J. P. Partanen, *Phys. Rev. Lett.*, 1997, 78, 891-894.
- [11] R. W. Hellwarth and I. Biaggio, *Phys. Rev. B*, 1999, 60, 299-307.
- [12] J. M. Frost, *Phys. Rev. B*, 2017, 96, 195202.
- [13] M. Gajdoš, K. Hummer, G. Kresse, J. Furthmüller and F. Bechstedt, *Phys. Rev. B*, 2006, 73, 045112.
- [14] A. Moscowitz, *Adv. Chem. Phys.*, 1962, 4, 67-112.
- [15] S. Saha, T. P. Sinha and A. Mookerjee, *Phys. Rev. B*, 2000, 62, 8828-8834.
- [16] I. Johnston, G. Keeler, R. Rollins and S. Spicklemire, *Solid State Physics Simulations. The Consortium for Upper Level Physics Software*, Wiley, New York, 1996.
- [17] W. Voigt, *Ann. Phys.*, 1889, 38, 573.
- [18] A. Reuss and Z. *Angew. Math. Mech.*, 1929, 9, 49.
- [19] R. Hill, *Proc. Phys. Soc. A*, 1952, 65, 349.
- [20] V. Wang, N. Xu, J. C. Liu, G. Tang and W. T. Geng, *Computer Physics Communications*, 2021, 267, 108033.
- [21] X.-G. Zhao, J.-H. Yang, Y. Fu, D. Yang, Q. Xu, L. Yu, S.-H. Wei and L. Zhang, *J. Am. Chem. Soc.*, 2017, 139, 2630–2638.
- [22] L. Yu and A. Zunger, *Phys. Rev. Lett.*, 2012, 108, 068701.
- [23] L. Yu, R. S. Kokenyesi, D. A. Keszler and A. Zunger, *Adv. Energy Mater.*, 2013, 3, 43-48.
- [24] A. Luque and S. Hegedus, *Handbook of Photovoltaic Science and Engineering*; John Wiley & Sons, 2011.
